# Supplementary material for: Bacteriophage GC1, a Novel Tectivirus Infecting Gluconobacter Cerinus, an Acetic Acid Bacterium Associated with Wine-Making
Source: PubMed Central journal article supplement (PMC5795452; doi:10.3390/v10010039), 2018-01-16
Supplement: viruses-10-00039-s001.pdf [file viruses-10-00039-s001.pdf]

**Table S1. Summary of the general features of *G. cerinus* phage GC1**

| N° CDS | Size(aa) | Strand | Putative function    | Conserved domain                                                                      | BBH (Source, accession)                                                                                                              | identical/total; % id    | e-value        |
|--------|----------|--------|----------------------|---------------------------------------------------------------------------------------|--------------------------------------------------------------------------------------------------------------------------------------|--------------------------|----------------|
| 1      | 559      | -      | Hypothetical protein | rhamnolacturonase, glycosylase domain (1RMG, P=99.6), likely receptor-binding protein | Hypothetical protein ( <i>Gluconobacter oxydans</i> , WP_062494220.1)                                                                | 135/529; 26              | 2e-29          |
| 2      | 561      | -      | DNA polymerase       | DNA_pol_B_2 (pfam03175)                                                               | DNA polymerase (phage PRD1, NP_040682.1)                                                                                             | 235/571; 41              | 1e-130         |
| 3      | 271      | -      | Hypothetical protein | -                                                                                     | -                                                                                                                                    | -                        | -              |
| 4      | 367      | +      | Hypothetical protein | -                                                                                     | -                                                                                                                                    | -                        | -              |
| 5      | 86       | +      | Hypothetical protein | HTH DNA-binding protein (3F8M, P=90)                                                  | -                                                                                                                                    | -                        | -              |
| 6      | 74       | +      | Hypothetical protein | -                                                                                     | Assembly protein PRD1-P10, fragment (phage PRD1, gi 61394104 AAX45904.1)                                                             | 26/61; 43                | 0.03           |
| 7      | 169      | +      | Hypothetical protein | -                                                                                     | Packaging efficiency factor PRD1-P6 (Enterobacteria phage L17, AAX45553)                                                             | 36/116; 31               | 0.003          |
| 8      | 75       | +      | Hypothetical protein | -                                                                                     | Assembly protein PRD1-P10, fragment (Enterobacteria phage PR4, AAA32443)                                                             | 28/65; 43                | 4e-08          |
| 9      | 225      | +      | DNA packaging ATPase | -                                                                                     | DNA packaging ATPase PRD1-P9 (phage PRD1, NP_040689.1)                                                                               | 95/231; 41               | 2e-56          |
| 10     | 40       | +      | Hypothetical protein | -                                                                                     | PRD1-P10 (Salmonella virus PRD1, NP_040690)                                                                                          | 11/31; 35                | 5e-04          |
| 11     | 46       | +      | Hypothetical protein | -                                                                                     | -                                                                                                                                    | -                        | -              |
| 12     | 399      | +      | Major capsid protein | Phage_Capsid_P3 (pfam09018)                                                           | Chain A, P3, The Major Coat Protein (phage PRD1, 1HX6_A)                                                                             | 120/377; 32              | 8e-43          |
| 13     | 63       | +      | Hypothetical protein | -                                                                                     | -                                                                                                                                    | -                        | -              |
| 14     | 38       | +      | Hypothetical protein | -                                                                                     | PRD1-gpx (Salmonella virus PRD1, YP_001542610)                                                                                       | 10/16; 63                | 0.019          |
| 15     | 63       | +      | Hypothetical protein | -                                                                                     | -                                                                                                                                    | -                        | -              |
| 16     | 87       | +      | Hypothetical protein | -                                                                                     | DNA delivery protein, PRD1-P18 (phage PRD1, gi 61394111 AAX45911.1)                                                                  | 25/85; 29                | 6e-10          |
| 17     | 55       | +      | Hypothetical protein | PRD1_DD phage membrane DNA delivery (pfam11087)                                       | DNA delivery protein, PRD1-P32 (phage PRD1, YP_001542612)                                                                            | 28/53; 53                | 1e-07          |
| 18     | 71       | +      | DNA delivery protein | PRD1_DD phage membrane DNA delivery (pfam11087)                                       | DNA delivery protein, PRD1-P34 (phage PRD1, NP_040696)                                                                               | 31/53; 58                | 3e-16          |
| 19     | 96       | +      | Hypothetical protein | -                                                                                     | -                                                                                                                                    | -                        | -              |
| 20     | 180      | +      | Hypothetical protein | -                                                                                     | -                                                                                                                                    | -                        | -              |
| 21     | 61       | +      | Hypothetical protein | -                                                                                     | -                                                                                                                                    | -                        | -              |
| 22     | 199      | +      | Peptidase            | Lytic transglycosylase (4C5F, P=99.4)                                                 | hypothetical protein ( <i>Paenibacillus herberti</i> , WP_089524389.1)                                                               | 33/77; 43                | 8e-04          |
| 23     | 135      | +      | Structural protein   | Virion protein (PHA02564)                                                             | Structural protein ( <i>Klebsiella aerogenes</i> , WP_032708580.1)<br>Structural protein P5 (Pseudoalteromonas phage PM2, NP_049909) | 60/130; 46<br>49/133; 37 | 4e-30<br>3e-19 |
| 24     | 137      | +      | Hypothetical protein | -                                                                                     | -                                                                                                                                    | -                        | -              |
| 25     | 76       | +      | Hypothetical protein | -                                                                                     | -                                                                                                                                    | -                        | -              |
| 26     | 225      | +      | Hypothetical protein | -                                                                                     | -                                                                                                                                    | -                        | -              |
| 27     | 68       | +      | Hypothetical protein | -                                                                                     | -                                                                                                                                    | -                        | -              |
| 28     | 55       | +      | Hypothetical protein | -                                                                                     | -                                                                                                                                    | -                        | -              |
| 29     | 81       | +      | Hypothetical protein | -                                                                                     | -                                                                                                                                    | -                        | -              |
| 30     | 59       | +      | Hypothetical protein | -                                                                                     | -                                                                                                                                    | -                        | -              |

| N° CDS | Size(aa) | Strand | Putative function    | Conserved domain | BBH (Source, accession)                                                          | identical/total; % id | e-value |
|--------|----------|--------|----------------------|------------------|----------------------------------------------------------------------------------|-----------------------|---------|
| 31     | 57       | +      | Hypothetical protein | -                | Hypothetical protein OR214_00015 ( <i>Ralstonia pickettii</i> OR214, ENZ79599.1) | 18/39; 46             | 0.01    |
| 32     | 69       | +      | Hypothetical protein | -                | -                                                                                | -                     | -       |
| 33     | 45       | +      | Hypothetical protein | -                | -                                                                                | -                     | -       |
| 34     | 38       | +      | Hypothetical protein | -                | -                                                                                | -                     | -       |
| 35     | 92       | +      | Hypothetical protein | -                | -                                                                                | -                     | -       |
| 36     | 97       | +      | Hypothetical protein | -                | Hypothetical protein ( <i>Acetobacter persici</i> , WP_077932138.1)              | 25/106; 24            | 0.017   |
